# Supplementary material for: Global transcriptomic analysis of model human cell lines exposed to surface-modified gold nanoparticles: the effect of surface chemistry
Source: Royal Society of Chemistry journal article supplement (doi:10.1039/c4nr05166a), 2014-11-28
Supplement: c4nr05166a1.pdf [file c4nr05166a1.pdf]

## *Supporting Information for*

# Global Transcriptomic Analysis of Model Human Cell Lines Exposed to Surface-Modified Gold Nanoparticles: The Effect of Surface Chemistry

*Elissa M. Grzincic,<sup>a</sup> Jie An Yang,<sup>a</sup> Jenny Drnevich,<sup>b</sup> Priscila Falagan-Lotsch,<sup>c\*</sup> Catherine J.  
Murphy<sup>a\*</sup>*

<sup>a</sup>Department of Chemistry, University of Illinois at Urbana-Champaign, Urbana, IL 61801,  
United States

<sup>b</sup>High Performance Biological Computing group, Roy J. Carver Biotechnology Center,  
University of Illinois at Urbana-Champaign, Urbana, IL 61801, United States

<sup>c</sup>Laboratory of Toxicology, Division of Bioengineering, Board of Life Sciences Metrology,  
National Institute of Metrology, Quality and Technology (INMETRO), Duque de Caxias, Rio de  
Janeiro 25250-929, Brazil

\*Address correspondence to [pflotsch@inmetro.gov.br](mailto:pflotsch@inmetro.gov.br); [murphycj@illinois.edu](mailto:murphycj@illinois.edu)

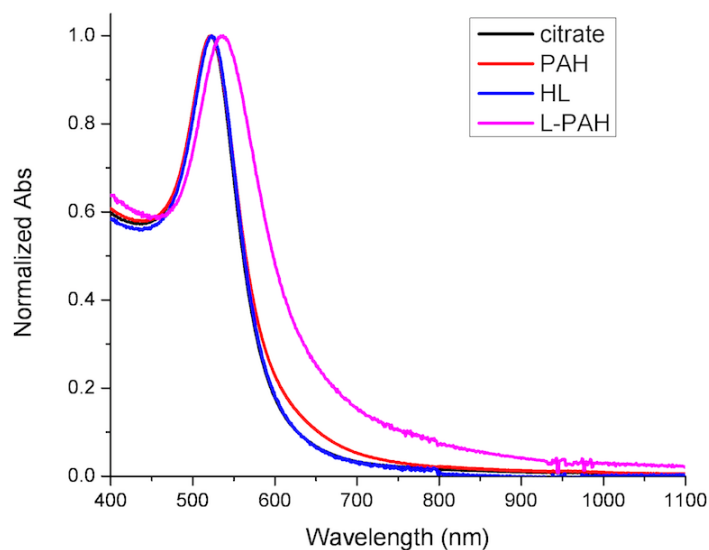

**Figure S1.** UV-Vis spectra of citrate, PAH, HL and L-PAH Au NPs in water.

**Table S1.** Analysis of selected gene categories after treatment of HDF cells with 0.1 nM Au NPs

| GO accession number (class) <sup>a</sup> | Gene category annotation              | Reg. <sup>b</sup> | Number of genes in category <sup>c</sup> | % genes in category <sup>d</sup> | p-value <sup>e</sup>  |
|------------------------------------------|---------------------------------------|-------------------|------------------------------------------|----------------------------------|-----------------------|
| <u>HL Au NPs</u>                         |                                       |                   |                                          |                                  |                       |
| GO:0044421 (CC)                          | extracellular region part             | Down              | 5                                        | 23.8                             | 0.0342                |
| <u>PAH Au NPs</u>                        |                                       |                   |                                          |                                  |                       |
| GO:0007049 (BP)                          | cell cycle                            | Up                | 119                                      | 22.9                             | 6.8x10 <sup>-53</sup> |
| GO:0000279 (BP)                          | M phase                               | Up                | 72                                       | 13.9                             | 2.1x10 <sup>-41</sup> |
| GO:0006259 (BP)                          | DNA metabolic process                 | Up                | 80                                       | 15.4                             | 1.9x10 <sup>-35</sup> |
| GO:0031981 (CC)                          | nuclear lumen                         | Up                | 108                                      | 20.8                             | 2.4x10 <sup>-21</sup> |
| GO:0015630 (CC)                          | microtubule cytoskeleton              | Up                | 60                                       | 11.6                             | 5.2x10 <sup>-19</sup> |
| GO:0000075 (BP)                          | cell cycle checkpoint                 | Up                | 24                                       | 4.62                             | 1.4x10 <sup>-15</sup> |
| GO:0000082 (BP)                          | G1/S transition of mitotic cell cycle | Up                | 8                                        | 1.5                              | 1.3x10 <sup>-3</sup>  |
| GO:0031012 (CC)                          | extracellular matrix                  | Down              | 32                                       | 4.9                              | 3.2x10 <sup>-7</sup>  |
| GO:0006631 (BP)                          | fatty acid metabolic process          | Down              | 19                                       | 2.9                              | 1.2x10 <sup>-4</sup>  |
| GO:0006350 (BP)                          | transcription                         | Down              | 98                                       | 15.0                             | 4.9x10 <sup>-4</sup>  |

|                     |                                       |      |     |      |                       |
|---------------------|---------------------------------------|------|-----|------|-----------------------|
| GO:0042981 (BP)     | regulation of apoptosis               | Down | 45  | 6.9  | $9.3 \times 10^{-4}$  |
| GO:0004175 (MF)     | endopeptidase activity                | Down | 25  | 3.8  | $2.2 \times 10^{-3}$  |
| GO:0030247 (MF)     | polysaccharide binding                | Down | 14  | 2.2  | $2.3 \times 10^{-3}$  |
| GO:0016477 (BP)     | cell migration                        | Down | 19  | 2.9  | $5.6 \times 10^{-3}$  |
| GO:0046872 (MF)     | metal ion binding                     | Down | 161 | 24.7 | $2.6 \times 10^{-2}$  |
| <u>L-PAH Au NPs</u> |                                       |      |     |      |                       |
| GO:0007049 (BP)     | cell cycle                            | Up   | 129 | 22.5 | $2.2 \times 10^{-57}$ |
| GO:0000279 (BP)     | M phase                               | Up   | 83  | 14.5 | $2.9 \times 10^{-50}$ |
| GO:0006259 (BP)     | DNA metabolic process                 | Up   | 85  | 14.8 | $5.8 \times 10^{-37}$ |
| GO:0031981 (CC)     | nuclear lumen                         | Up   | 113 | 19.7 | $5.9 \times 10^{-21}$ |
| GO:0015630 (CC)     | microtubule cytoskeleton              | Up   | 63  | 11.0 | $3.1 \times 10^{-19}$ |
| GO:0000075 (BP)     | cell cycle checkpoint                 | Up   | 24  | 4.2  | $8.5 \times 10^{-15}$ |
| GO:0000082 (BP)     | G1/S transition of mitotic cell cycle | Up   | 7   | 1.2  | $9.2 \times 10^{-3}$  |
| GO:0031012 (CC)     | extracellular matrix                  | Down | 31  | 5.3  | $8.1 \times 10^{-8}$  |
| GO:0046872 (MF)     | metal ion binding                     | Down | 156 | 26.7 | $2.3 \times 10^{-4}$  |
| GO:0042981 (BP)     | regulation of apoptosis               | Down | 43  | 7.4  | $2.7 \times 10^{-4}$  |
| GO:0030247 (MF)     | polysaccharide binding                | Down | 12  | 2.1  | $6.1 \times 10^{-3}$  |
| GO:0004175 (MF)     | endopeptidase activity                | Down | 21  | 3.6  | $8.1 \times 10^{-3}$  |
| GO:0016477 (BP)     | cell migration                        | Down | 17  | 2.9  | $8.7 \times 10^{-3}$  |

<sup>a</sup>Gene ontology classifications are cellular component (CC), biological process (BP) or molecular function (MF). <sup>b</sup>Denotes up for up-regulation, down for down-regulation. <sup>c</sup>Genes that were sufficiently up-regulated (raw p-value < 0.05, FC > 1.5) and down-regulated (raw p-value < 0.05, FC < -1.5) were separately entered into DAVID using medium stringency threshold. The number of genes that fall into the GO category for either the up- or down-regulated genes is shown. <sup>d</sup>Percent of up- or down-regulated genes entered into DAVID that fall under selected GO category. <sup>e</sup>One-tail Fisher Exact p-value for gene-enrichment analysis. The smaller the value, the more enriched the gene category; p-value < 0.05 considered significant.

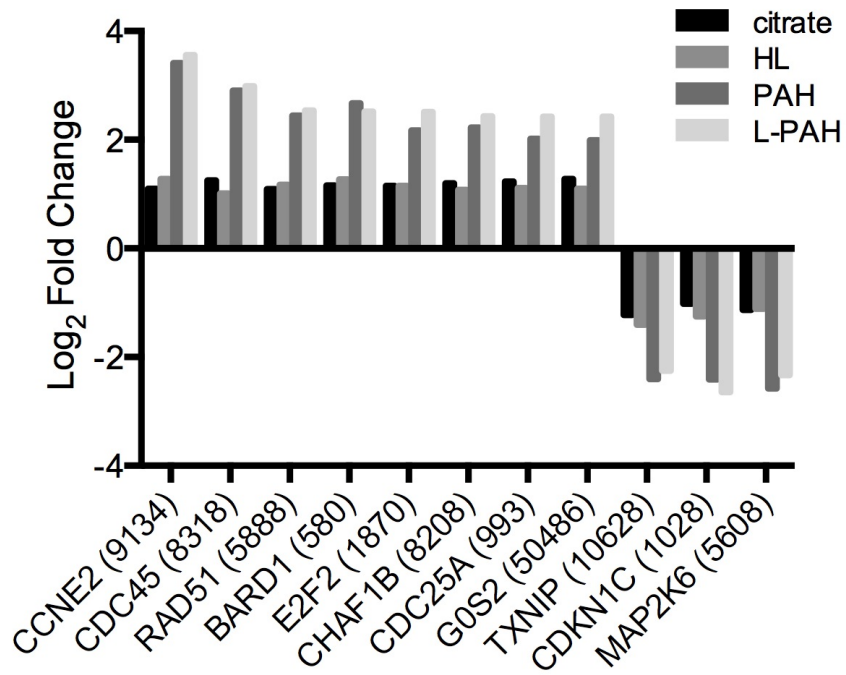

**Figure S2.** Most significantly changed genes of HDF cells after 0.1 nM Au NP incubation that fall under the “cell cycle” gene category (GO accession number GO:0007049)

**Table S2.** Analysis of selected gene categories after treatment of PC3 cells with 1 nM Au NPs

| GO accession number (class) <sup>a</sup> | Gene category annotation              | Reg. <sup>b</sup> | Number of genes in category <sup>c</sup> | % genes in category <sup>d</sup> | p-value <sup>e</sup>  |
|------------------------------------------|---------------------------------------|-------------------|------------------------------------------|----------------------------------|-----------------------|
| <u>Citrate Au NPs</u>                    |                                       |                   |                                          |                                  |                       |
| GO:0010498 (BP)                          | proteasomal protein catabolic process | Down              | 3                                        | 17.7                             | 5.5x10 <sup>-3</sup>  |
| GO:0031396 (BP)                          | regulation of protein ubiquitination  | Down              | 3                                        | 17.7                             | 5.3x10 <sup>-3</sup>  |
| <u>HL Au NPs</u>                         |                                       |                   |                                          |                                  |                       |
| GO:0046870 (MF)                          | cadmium ion binding                   | Up                | 6                                        | 7.6                              | 2.1x10 <sup>-10</sup> |
| GO:0005507 (MF)                          | copper ion binding                    | Up                | 6                                        | 7.6                              | 7.8x10 <sup>-6</sup>  |
| GO:0001525 (BP)                          | angiogenesis                          | Up                | 6                                        | 7.6                              | 3.9x10 <sup>-4</sup>  |
| GO:0040012 (BP)                          | regulation of locomotion              | Up                | 6                                        | 7.6                              | 1.3x10 <sup>-3</sup>  |
| GO:0001944 (BP)                          | vasculature development               | Up                | 6                                        | 7.6                              | 4.0x10 <sup>-3</sup>  |
| GO:0016477 (BP)                          | cell migration                        | Up                | 6                                        | 7.6                              | 6.0x10 <sup>-3</sup>  |
| GO:0005125 (MF)                          | cytokine activity                     | Up                | 4                                        | 5.1                              | 4.3x10 <sup>-2</sup>  |
| GO:0016408 (MF)                          | C-acyltransferase activity            | Down              | 3                                        | 3.2                              | 2.4x10 <sup>-3</sup>  |
| GO:0015293 (MF)                          | symporter activity                    | Down              | 5                                        | 5.3                              | 3.7x10 <sup>-3</sup>  |
| GO:0006839 (BP)                          | mitochondrial transport               | Down              | 3                                        | 3.2                              | 4.2x10 <sup>-2</sup>  |
| GO:0006955 (BP)                          | immune response                       | Down              | 8                                        | 8.5                              | 4.4x10 <sup>-2</sup>  |
| <u>PAH Au NPs</u>                        |                                       |                   |                                          |                                  |                       |
| GO:0005524 (MF)                          | ATP binding                           | Down              | 65                                       | 15.7                             | 1.3x10 <sup>-7</sup>  |
| GO:0000166 (MF)                          | nucleotide binding                    | Down              | 84                                       | 20.2                             | 1.1x10 <sup>-6</sup>  |
| GO:0042325 (BP)                          | regulation of phosphorylation         | Down              | 24                                       | 5.8                              | 3.2x10 <sup>-4</sup>  |
| GO:0045859 (BP)                          | regulation of protein kinase activity | Down              | 16                                       | 4.6                              | 7.6x10 <sup>-4</sup>  |
| GO:0004386 (MF)                          | helicase activity                     | Down              | 11                                       | 2.7                              | 1.2x10 <sup>-3</sup>  |
| GO:0006325 (BP)                          | chromatin organization                | Down              | 18                                       | 4.3                              | 5.0x10 <sup>-3</sup>  |
| GO:0051276 (BP)                          | chromosome organization               | Down              | 21                                       | 5.1                              | 6.3x10 <sup>-3</sup>  |
| GO:0007049 (BP)                          | cell cycle                            | Down              | 26                                       | 6.3                              | 4.1x10 <sup>-2</sup>  |
| <u>L-PAH Au NPs</u>                      |                                       |                   |                                          |                                  |                       |
| GO:0005125 (MF)                          | cytokine activity                     | Up                | 17                                       | 4.7                              | 7.2x10 <sup>-8</sup>  |
| GO:0006955 (BP)                          | immune response                       | Up                | 34                                       | 9.3                              | 9.3x10 <sup>-8</sup>  |
| GO:0006954 (BP)                          | inflammatory response                 | Up                | 20                                       | 5.5                              | 3.5x10 <sup>-6</sup>  |
| GO:0042981 (BP)                          | regulation of apoptosis               | Up                | 32                                       | 8.8                              | 2.1x10 <sup>-5</sup>  |
| GO:0006916 (BP)                          | anti-apoptosis                        | Up                | 14                                       | 3.8                              | 5.9x10 <sup>-5</sup>  |
| GO:0043066 (BP)                          | negative regulation of apoptosis      | Up                | 18                                       | 4.9                              | 1.4x10 <sup>-4</sup>  |

|                 |                                               |      |     |      |                      |
|-----------------|-----------------------------------------------|------|-----|------|----------------------|
| GO:0016477 (BP) | cell migration                                | Up   | 14  | 3.8  | 1.0x10 <sup>-3</sup> |
| GO:0040012 (BP) | regulation of locomotion                      | Up   | 8   | 2.2  | 4.8x10 <sup>-2</sup> |
| GO:0005524 (MF) | ATP binding                                   | Down | 119 | 11.2 | 2.0x10 <sup>-5</sup> |
| GO:0046578 (BP) | regulation of Ras protein signal transduction | Down | 26  | 2.5  | 2.1x10 <sup>-4</sup> |
| GO:0000166 (MF) | nucleotide binding                            | Down | 160 | 15.1 | 3.8x10 <sup>-4</sup> |
| GO:0042981 (BP) | regulation of apoptosis                       | Down | 67  | 6.3  | 5.7x10 <sup>-4</sup> |
| GO:0016192 (BP) | vesicle-mediated transport                    | Down | 50  | 4.7  | 1.4x10 <sup>-3</sup> |
| GO:0043065 (BP) | positive regulation of apoptosis              | Down | 37  | 3.5  | 7.3x10 <sup>-3</sup> |
| GO:0035023 (BP) | regulation of Rho protein signal transduction | Down | 13  | 1.2  | 7.7x10 <sup>-3</sup> |
| GO:0031012 (CC) | extracellular matrix                          | Down | 31  | 2.9  | 7.9x10 <sup>-3</sup> |
| GO:0046834 (BP) | lipid phosphorylation                         | Down | 5   | 0.5  | 9.5x10 <sup>-3</sup> |
| GO:0008289 (MF) | lipid binding                                 | Down | 37  | 3.5  | 1.7x10 <sup>-2</sup> |
| GO:0030036 (BP) | actin cytoskeleton organization               | Down | 20  | 1.9  | 4.1x10               |
| GO:0032483 (BP) | regulation of Rab protein signal transduction | Down | 7   | 0.7  | 4.2x10 <sup>-2</sup> |

<sup>a</sup>Gene ontology classifications are cellular component (CC), biological process (BP) or molecular function (MF). <sup>b</sup>Denotes up for up-regulation, down for down-regulation. <sup>c</sup>Genes that were sufficiently up-regulated (raw p-value < 0.05, FC > 1.5) and down-regulated (raw p-value < 0.05, FC < -1.5) were separately entered into DAVID using medium stringency threshold. The number of genes that fall into the GO category for either the up- or down-regulated genes is shown. <sup>d</sup>Percent of up- or down-regulated genes entered into DAVID that fall under selected GO category. <sup>e</sup>One-tail Fisher Exact p-value for gene-enrichment analysis. The smaller the value, the more enriched the gene category; p-value < 0.05 considered significant.

**Table S3.** Primer/probe sets used for PCR validation of microarray results

| Gene symbol | Entrez ID | Gene name                                                                         | TaqMan® Assay ID | Cell Line |
|-------------|-----------|-----------------------------------------------------------------------------------|------------------|-----------|
| CXCL1       | 2919      | chemokine (C-X-C motif) ligand 1 (melanoma growth stimulating activity, alpha)    | Hs00236937_m1    | HDF/PC3   |
| CCNE2       | 9134      | cyclin E2                                                                         | Hs00180319_m1    | HDF       |
| DTL         | 51514     | denticleless E3 ubiquitin protein ligase homolog                                  | Hs00978565_m1    | HDF       |
| GAL         | 51083     | galanin/GMAP prepropeptide                                                        | Hs00544355_m1    | HDF       |
| RRM2        | 6241      | ribonucleotide reductase M2                                                       | Hs00357247_g1    | HDF       |
| WFDC1       | 58189     | WAP four-disulfide core domain 1                                                  | Hs00221849_m1    | HDF       |
| SLC9A9      | 285195    | solute carrier family 9, subfamily A (NHE9, cation proton antiporter 9), member 9 | Hs00543518_m1    | HDF       |

|         |       |                                                                    |               |         |
|---------|-------|--------------------------------------------------------------------|---------------|---------|
| FAXDC 2 | 10826 | fatty acid hydroylase domain containing 2                          | Hs00260753_m1 | HDF     |
| ADH1A   | 124   | alcohol dehydrogenase 1A (class I), alpha polypeptide              | Hs00605167_g1 | HDF     |
| AKR1C3  | 8644  | aldo-keto reductase family 1, member C3                            | Hs00366267_m1 | HDF     |
| IL8     | 3576  | interleukin 8                                                      | Hs00174103_m1 | PC3     |
| LTB     | 4050  | lymphotoxin beta (TNF superfamily, member 3)                       | Hs00242739_m1 | PC3     |
| BCL2A1  | 597   | BCL2-related protein A1                                            | Hs00187845_m1 | PC3     |
| BAK1    | 578   | BCL2-antagonist/killer 1                                           | Hs00832876_g1 | PC3     |
| LAMB2   | 3913  | laminin, beta 2 (laminin S)                                        | Hs00158642_m1 | PC3     |
| DDR1    | 780   | discoidin domain receptor tyrosine kinase 1                        | Hs01058430_m1 | PC3     |
| BAP1    | 8314  | BRCA1 associated protein-1 (ubiquitin carboxyl-terminal hydrolase) | Hs01109276_g1 | PC3     |
| TNK2    | 10188 | tyrosine kinase, non-receptor, 2                                   | Hs00416477_m1 | PC3     |
| NES     | 10763 | nestin                                                             | Hs04187831_g1 | PC3     |
| GAPDH   | 2597  | glyceraldehyde-3-phosphate dehydrogenase                           | Hs99999905_m1 | HDF/PC3 |
| B2M     | 567   | beta-2-microglobulin                                               | Hs99999907_m1 | HDF/PC3 |
| HPRT1   | 3251  | hypoxanthine phosphoribosyltransferase 1                           | Hs99999909_m1 | HDF/PC3 |
